# Supplementary material
Source: ML conference proceedings conference paper supplement (https://openreview.net/forum?id=cxvEGLCHpgl)
Supplement: supplementary_material [file result_err.xlsx]

## Sheet: Sheet1
Dataset	n	K	SCORE+	n_L / n	AngleMin+	SNMF	GNN (constant)	GNN (random)	GNN (adjacency)
Caltech	590	8	0.237 (0.061)	0.3	0.207 (0.059)	0.312 (0.049)	0.858 (0.038)	0.859 (0.035)	0.875 (0.038)
				0.5	0.151 (0.04)	0.31 (0.042)	0.846 (0.054)	0.895 (0.026)	0.859 (0.037)
				0.7	0.137 (0.046)	0.264 (0.051)	0.849 (0.043)	0.861 (0.034)	0.856 (0.031)
Simmons	1137	4	0.234 (0.084)	0.3	0.128 (0.024)	0.266 (0.041)	0.691 (0.022)	0.702 (0.039)	0.702 (0.036)
				0.5	0.096 (0.024)	0.233 (0.033)	0.691 (0.022)	0.711 (0.034)	0.685 (0.025)
				0.7	0.092 (0.015)	0.22 (0.037)	0.691 (0.022)	0.692 (0.022)	0.691 (0.022)
Polblogs	1222	2	0.166 (0.165)	0.3	0.074 (0.036)	0.073 (0.019)	0.499 (0.044)	0.502 (0.038)	0.439 (0.048)
				0.5	0.092 (0.041)	0.068 (0.033)	0.517 (0.040)	0.516 (0.038)	0.453 (0.056)
				0.7	0.066 (0.026)	0.063 (0.028)	0.485 (0.041)	0.492 (0.043)	0.430 (0.062)
